# Supplementary material for: Glucosamine links hyperglycemia to mTORC1 activation and glucose toxicity in diabetes
Source: JCI journal article supplement (doi:10.1172/jci.insight.197331), 2026-05-22

**Fig 3C**

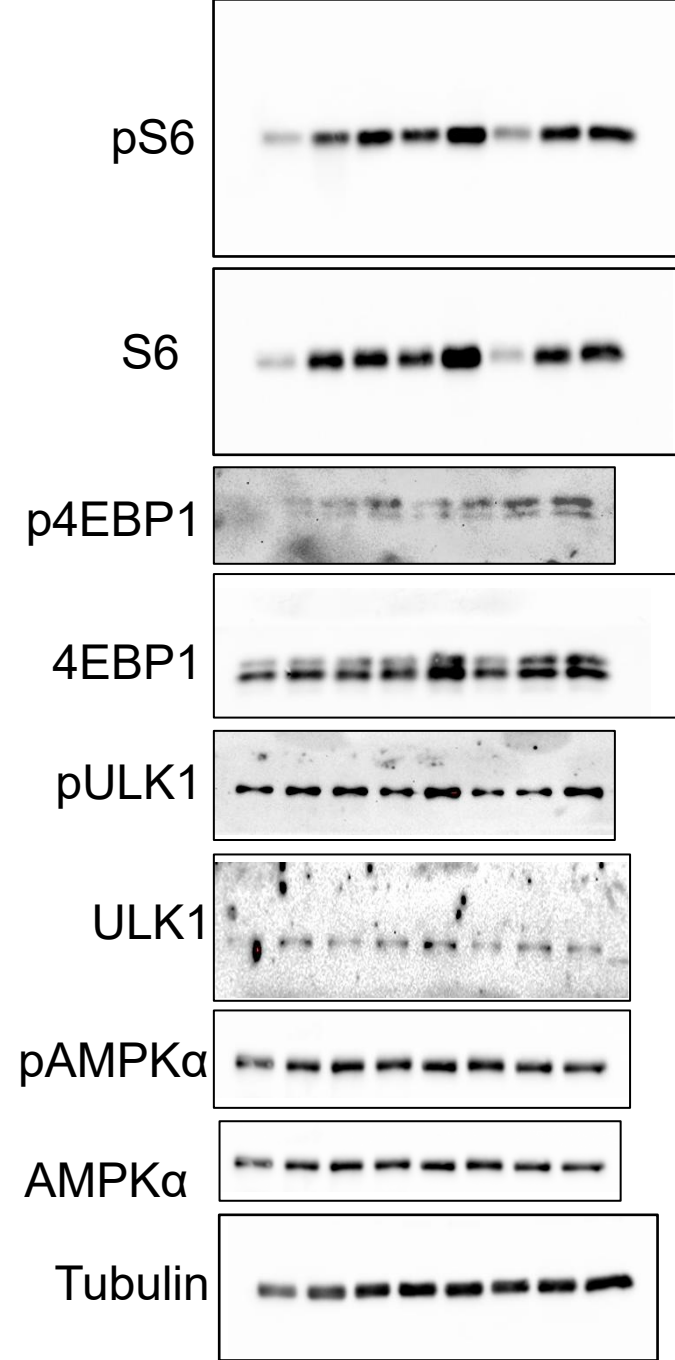

**Fig 3D**

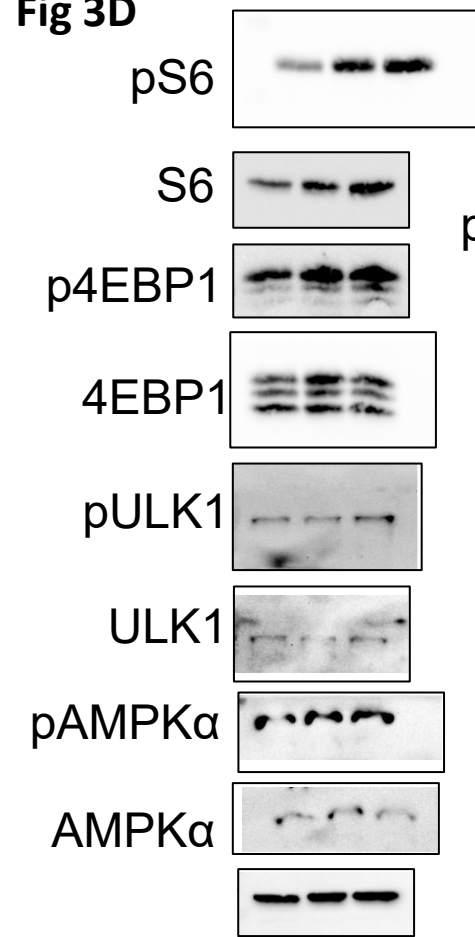

**Fig 3E**

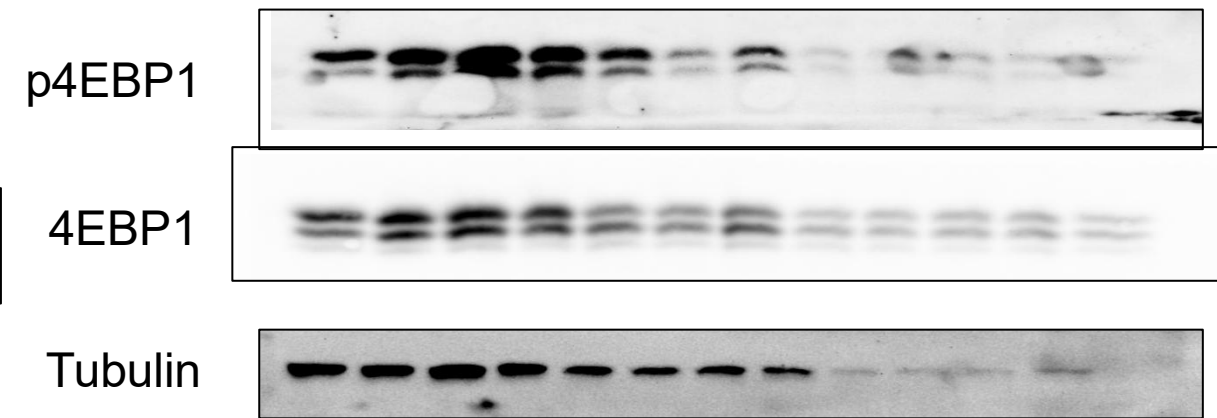

**Fig 3G**

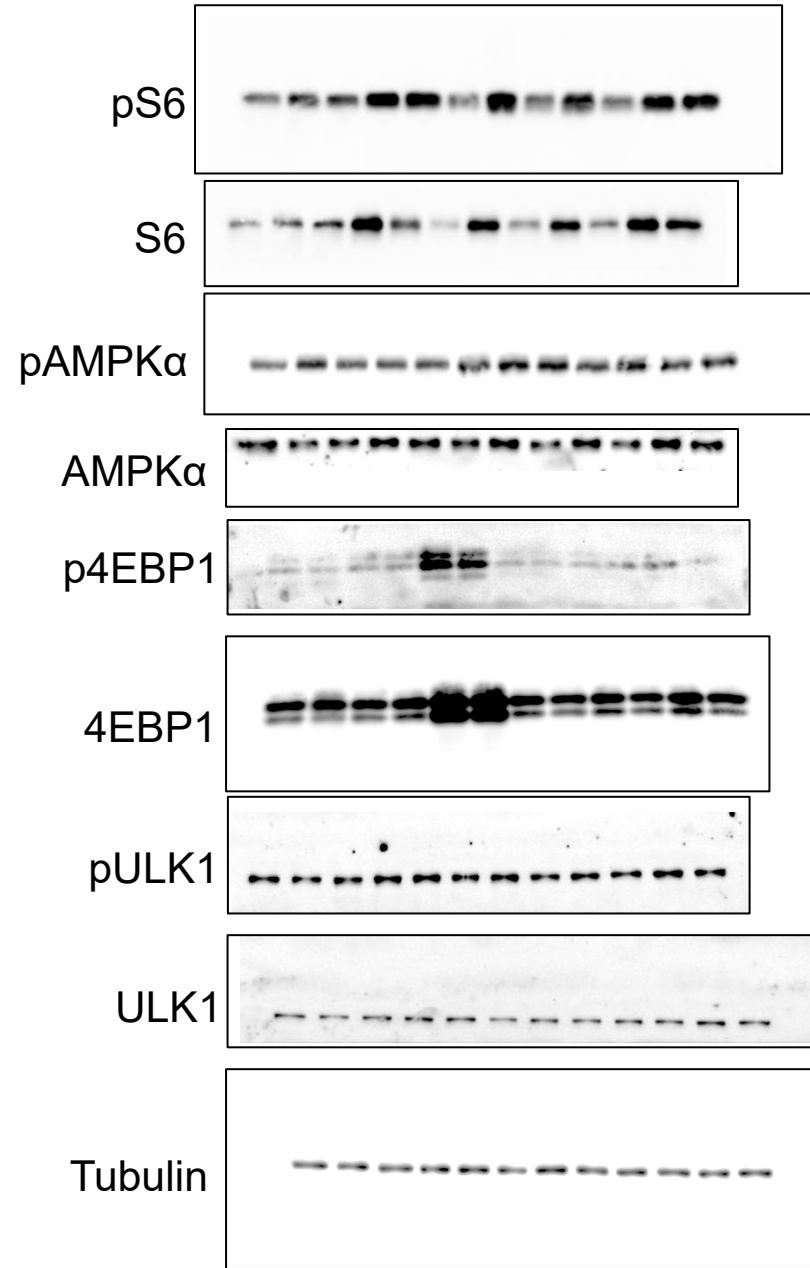

**Supplemental Fig S2 A**

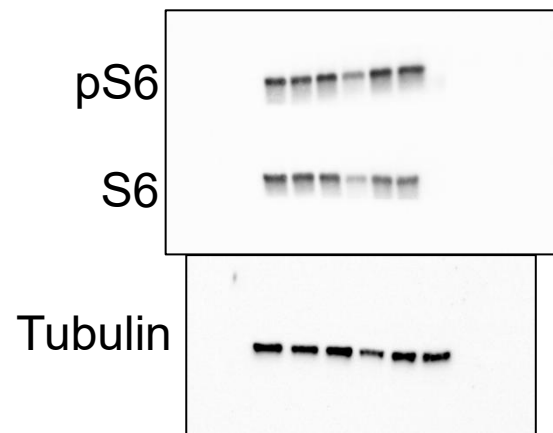

**Supplemental Fig S2 B**

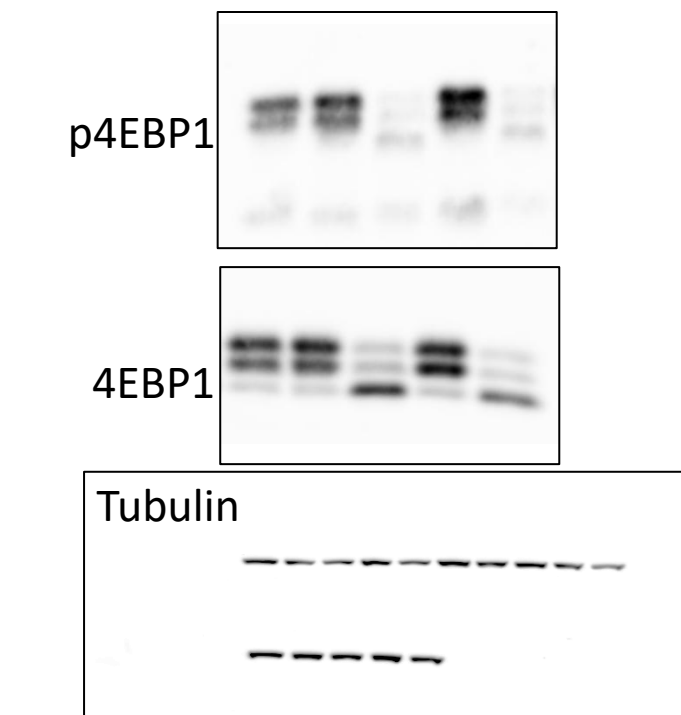

**Fig 4A**

**pS6**

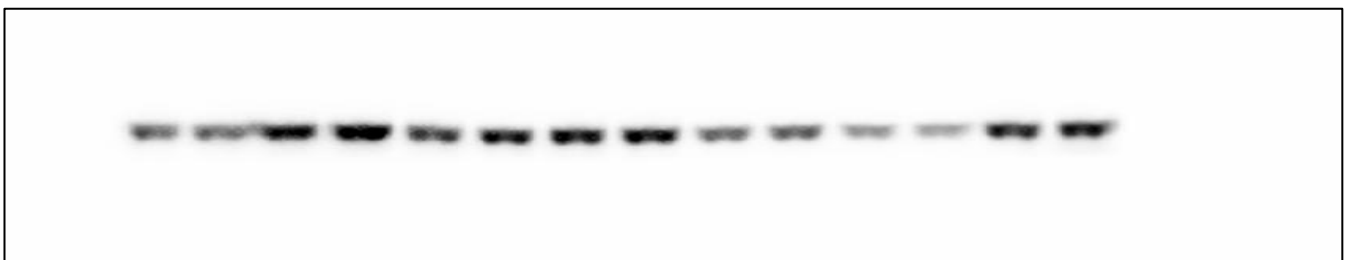

**tS6**

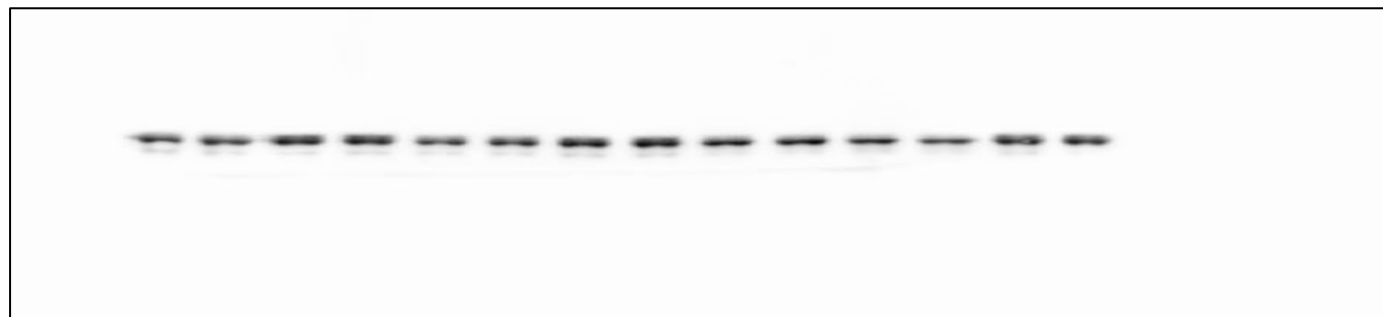

**p4E-BP1**

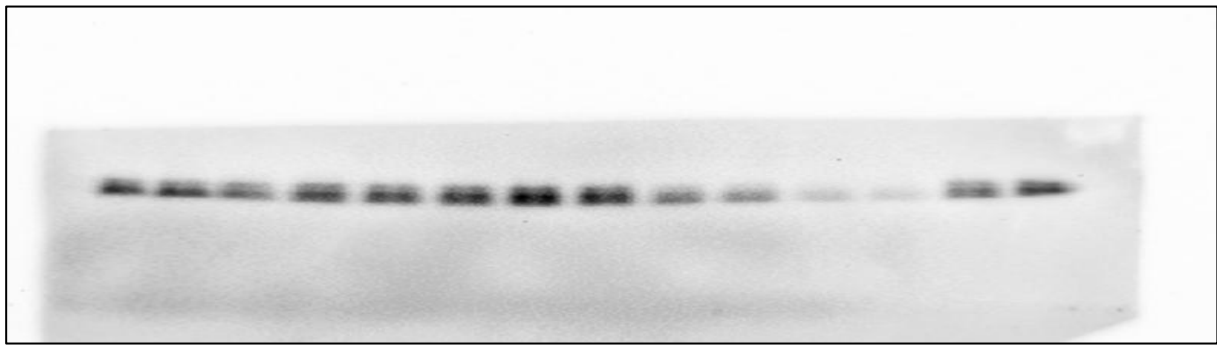

**4E-BP1**

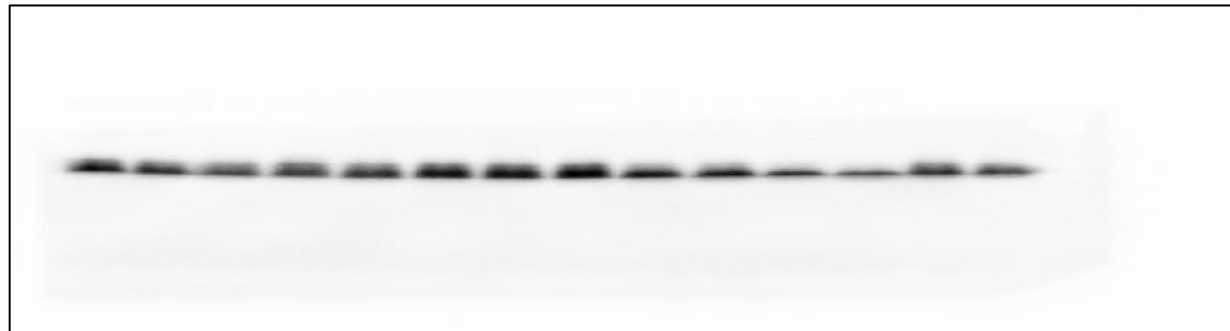



**Fig 4B**

**pS6**

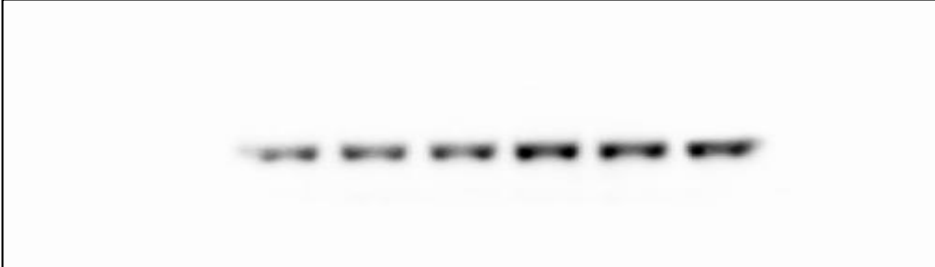

**S6**

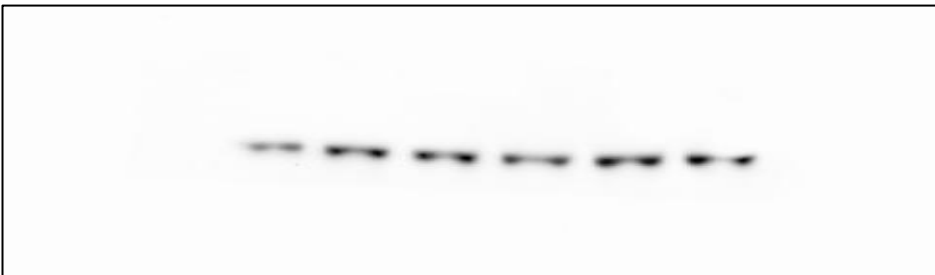

**p4EBP1**

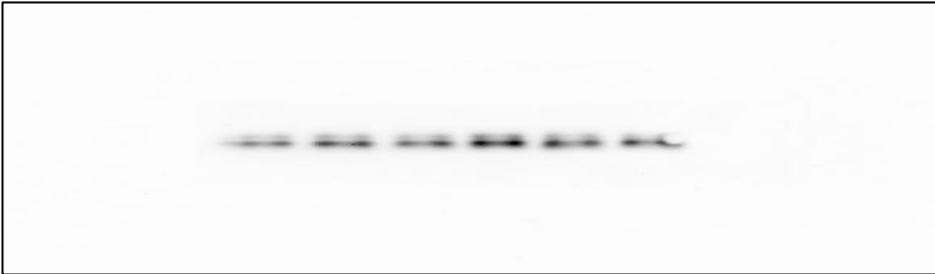

**t4EBP1**

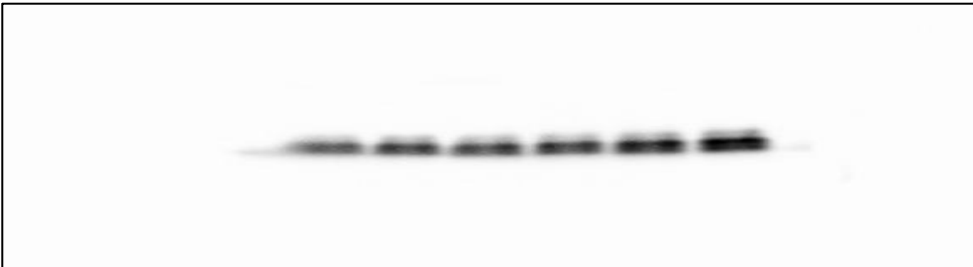

**Fig 4B**

**pAMPK<sup>(Thr172)</sup>**

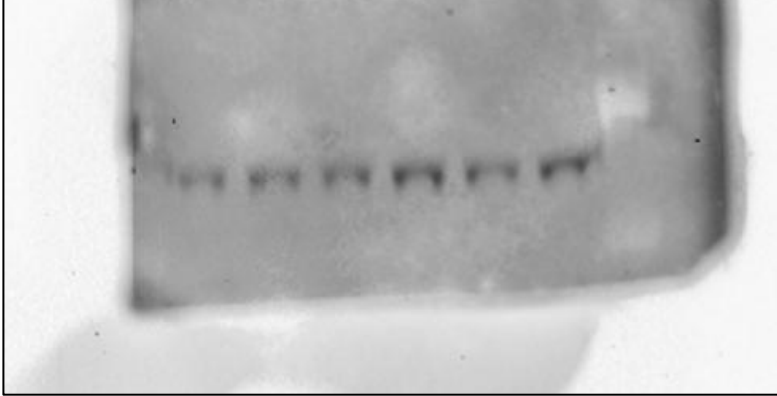

**tAMPK**

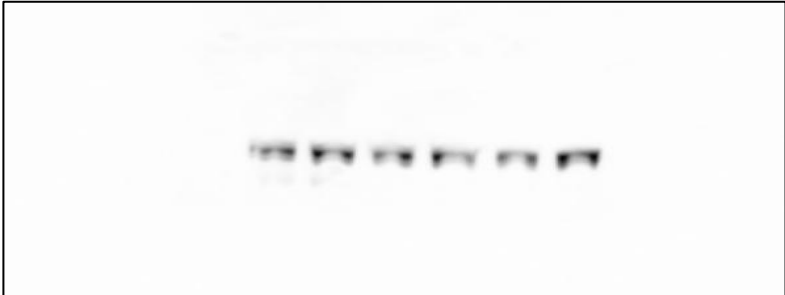

**pAkt<sup>(S473)</sup>**

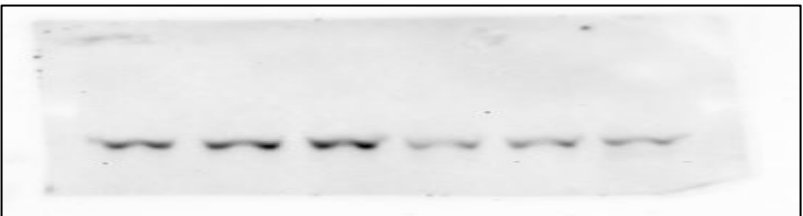

**Akt**

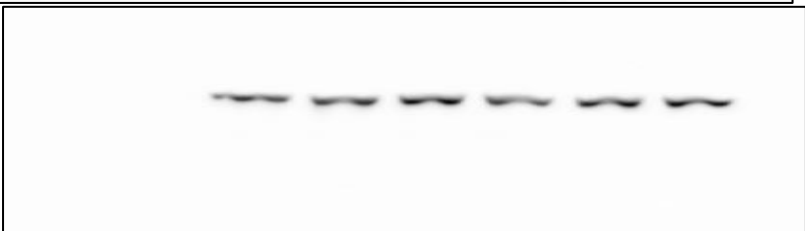

**GAPDH**

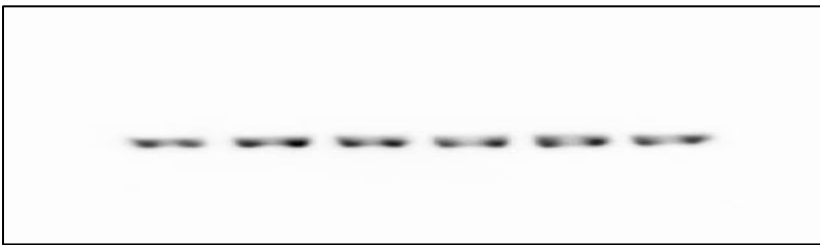

Supplement: sd2 [file 2]
